# Supplementary material
Source: PubMed Central journal article supplement (PMC9035265)
Supplement: NIHMS1796187-supplement-1796187_Sup_fig_1.pdf [file NIHMS1796187-supplement-1796187_Sup_fig_1.pdf]

**a** **Alix** (abcam ab186429, predicted size 97.80 kDa)

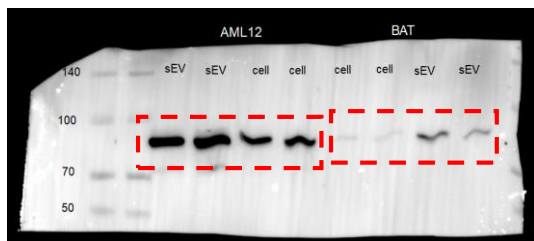

Note: BAT samples loaded in inverted order by error when loading gel

**TSG101** (Santa Cruz sc-7964, predicted size 45 kDa)

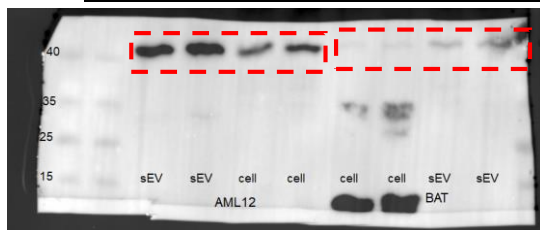

Note: same as Alix, as they come from the same blot

**CD9** (abcam ab92726, predicted size 25 kDa)

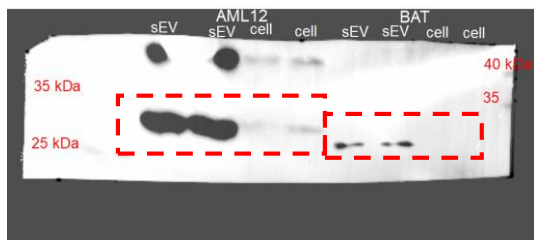

**GM130** (Santa Cruz sc-55590, predicted size 130 kDa)

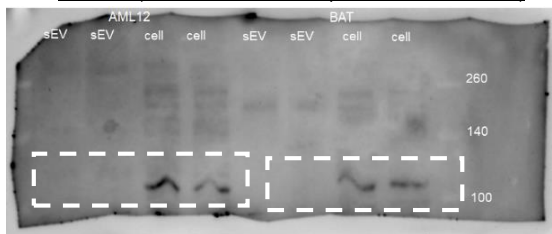

**CANX** (abcam ab22595, predicted size 90 kDa)

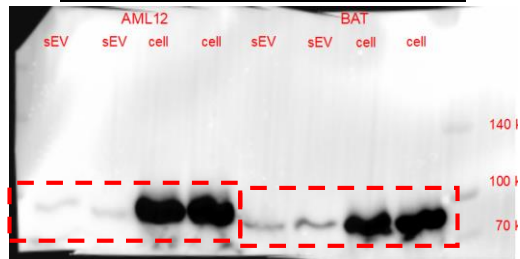

**CD63** (abcam ab68418, predicted size 25 kDa)

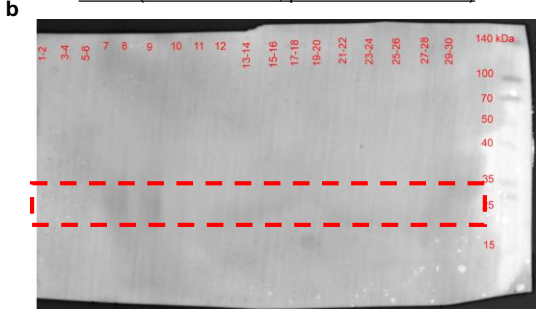

**CD9** (abcam ab92726, predicted size 25 kDa)

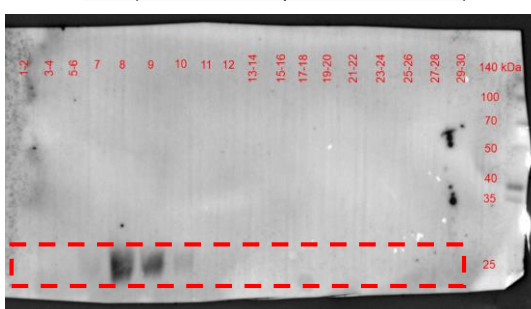

**Alyref** (Cell Signaling 12655, predicted size 70 kDa)

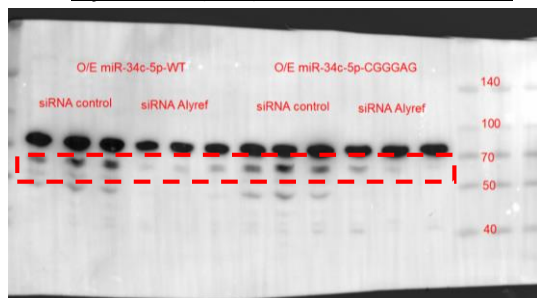

Note: brighter band at the top is likely a posttranscriptional-modified Alyref, larger than predicted size. In any case, it follows same behavior as selected.

**Fus** (Cell Signaling 4885, predicted size 70 kDa)

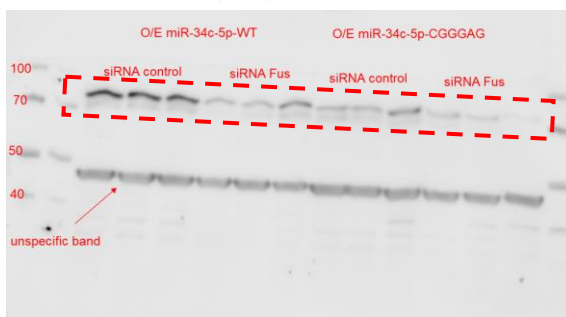

**Vinculin** for Alyref blot (Millipore-Sigma MAB3574, predicted size 117 kDa)

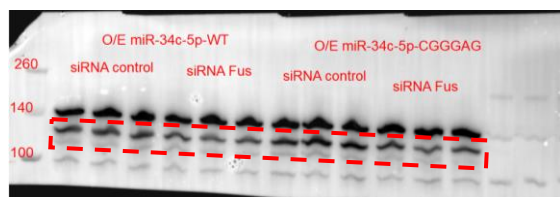

**Vinculin** for Fus blot (Millipore-Sigma MAB3574, predicted size 117 kDa)

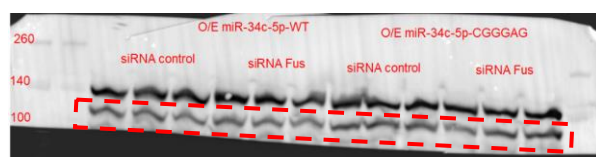

Note for vinculin: selected only band that is between 100-140 kDa. In any case, all bands follow same behavior.
